# Supplementary material for: A Method for Producing Transgenic Cells Using a Multi-Integrase System on a Human Artificial Chromosome Vector
Source: PLoS One. 2011 Feb 24;6(2):e17267. doi: 10.1371/journal.pone.0017267 (PMC3044732; doi:10.1371/journal.pone.0017267)
Supplement: Table S2 — The PCR primers used in this study. (XLS) [file pone.0017267.s006.xls]

## Sheet: Sheet1
Primer	Sequence (5’- 3’)
B1-FRT-PGK-ΦC31 attP-B5r F1	GAA GTT CCT ATA CTT TCT AGA GAA TAG GAA CTT CAT TCT ACC GGG TAG GGG AGG CGC TTT TCC C
B1-FRT-PGK-ΦC31 attP-B5r F2	GGG GAC AAG TTT GTA CAA AAA AGC AGG CTT GGA AGT TCC TAT ACT TTC TAG AGA ATA GGA A
B1-FRT-PGK-ΦC31 attP-B5r R1	CAA CTG AGA GAA CTC AAA GGT TAC CCC AGT TGG GGC ACT ACG GTC GAA AGG CCC GGA GAT GAG
	GAA GAG GA
B1-FRT-PGK-ΦC31 attP-B5r R2	GGG GAC AAC TTT TGT ATA CAA AGT TGT GAC CCT ACG CCC CCA ACT GAG AGA ACT CAA AGG TTA
	CCC CAG T
B5-PGK-R4 attP-B4 F1	GGG GAC AAC TTT GTA TAC AAA AGT TGA TAT TCT ACC GGG TAG GGG AGG CGC TTT TCC C
B5-PGK-R4 attP-B4 R1	CAC AAG CAG TAC CAC TGC TTC AAG TGG TAT CGC TTT GGG GAA CAT GCG GTC GAA AGG CCC GGA
	GAT GAG GAA GAG GA
B5-PGK-R4 attP-B4 R2	GGG GAC AAC TTT GTA TAG AAA AGT TGG GTG CAC CCG CAG AGT GTA CCC ACA AGC AGT ACC ACT
	GCT TCA AGT GGT AT
B4r-PGK-TP901 attP-B3r F1	GGG GAC AAC TTT TCT ATA CAA AGT TGA TAT TCT ACC GGG TAG GGG AGG CGC TTT TCC C
B4r-PGK-TP901 attP-B3r R1	CTT AAT TGA AAT AAA CGA AAT AAA AAC TCG CAA TTA AGC GAG TTG GAA GGT CGA AAG GCC CGG
	AGA TGA GGA AGA GGA
B4r-PGK-TP901 attP-B3r R2	GGG GAC AAC TTT ATT ATA CAA AGT TGT TAA AAG GAG TTT TTT AGT TAC CTT AAT TGA AAT AAA
	CGA AAT AAA AAC TCG
B3-PGK-Bxb1 attP-B2 F1	GGG GAC AAC TTT GTA TAA TAA AGT TGG TAT TCT ACC GGG TAG GGG AGG CGC TTT TCC C
B3-PGK-Bxb1 attP-B2 R1	AGA CCG CGG TGG TTG ACC AGA CAA ACC ACG AAG ACA CAG GTC ATC ACG GCC ATA GGT CGA AAG
	GCC CGG AGA TGA GGA AGA GGA
B3-PGK-Bxb1 attP-B2 R2	GGG GAC CAC TTT GTA CAA GAA AGC TGG GTA TGG GTT TGT ACC GTA CAC CAC TGA GAC CGC GGT
	GGT TGA CCA GAC AAA CCA CG
PGK2362	TGA TTG TTC AGG AGG AGG AAG CCG GTG GCG
loxP4548	AGA GCC TTC AAC CCA GTC AGC TCC TTC GAA
Neo F	AAA GAT ATC AAC TCG AGA TGG GAT CGG CCA TTG AAC AAG ATG GAT TG
Neo R	TTT GCT AGC CCC CAG CTG GTT CTT TCC GCC TCA GAA GCC
CMV-GFP F	AAA GGA TCC TAG TTA TTA ATA GTA ATC AAT TAC GGG GTC A
CMV-GFP R	TTT GGA TCC AGA TAC ATT GAT GAG TTT GGA CAA ACC ACA A-
ΦC31 F1	CCA ACT GGG GTA ACC TTT GAG
Bxb1 R3	GAC CAG ACA AAC CAC GAA GAC
Trans L1	TGG AGG CCA TAA ACA AGA AGA C
Trans R1	CCC CTT GAC CCA GAA ATT CCA
hyg696	GAT GTT GGC GAC CTC GTA TT
PGK5	AAT GGA AGT AGC ACG TCT CAC TAG TCT C
G418 3AS	GTA GCC AAC GCT ATG TCC TGA TAG CGG TCC
